# Supplementary material for: Is copper(i) hard or soft? A density functional study of mixed ligand complexes
Source: Royal Society of Chemistry journal article supplement (doi:10.1039/b618494b), 2007-01-01
Supplement: b618494b.pdf [file b618494b.pdf]

# Supplementary Material (ESI) for New Journal of Chemistry  
# This journal is (c) The Royal Society of Chemistry and  
# The Centre National de la Recherche Scientifique, 2007

**(Total four pages including the cover page)**

**Is Copper(I) Hard or Soft? A Density Functional Study of  
Mixed Ligand Complexes**

Chinnappan Sivasankar,<sup>†</sup> Nabanita Sadhukhan,<sup>‡</sup> Jitendra K. Bera<sup>‡,\*</sup> and  
Ashoka G. Samuelson<sup>†,\*</sup>

<sup>†</sup>*Department of Inorganic and Physical Chemistry, Indian Institute of Science, Bangalore,  
560012 India.*

<sup>‡</sup>*Department of Chemistry, Indian Institute of Technology, Kanpur, 208016 India.*

To whom correspondence should be addressed. E-mail: [ashoka@ipc.iisc.ernet.in](mailto:ashoka@ipc.iisc.ernet.in),  
Tel: (080) 2293 2663, Fax: (080) 360 1552

# Supplementary Material (ESI) for New Journal of Chemistry  
 # This journal is (c) The Royal Society of Chemistry and  
 # The Centre National de la Recherche Scientifique, 2007

**Tables S1-S7** Total Energy (E) (Zero point Energy corrected), Ionization potential (IP) and Electron affinity (EA) of Ni(0), Cu(I) and Zn(II) complexes of H<sub>2</sub>S, H<sub>2</sub>O, PH<sub>3</sub> and NH<sub>3</sub>.

**Table S1** Energies (Hartree)

| Systems              | E           | IP         | EA        |
|----------------------|-------------|------------|-----------|
| S (H <sub>2</sub> S) | -11.2755414 | 0.3875043  | 0.129087  |
| W (H <sub>2</sub> O) | -76.3935513 | 0.4578389  | 0.1679682 |
| P (PH <sub>3</sub> ) | -8.2465947  | 0.3840.712 | 0.1345815 |
| N (NH <sub>3</sub> ) | -56.5143517 | 0.366396   | 0.1922655 |

**Table S2** Energies (Hartree)

| Systems            | E            | IP        | EA        |
|--------------------|--------------|-----------|-----------|
| NiS <sub>3</sub>   | -203.1059329 | 0.1919522 | 0.0328653 |
| NiS <sub>2</sub> W | -268.2219504 | 0.1663549 | 0.0322743 |
| NiS <sub>4</sub>   | -214.3786714 | 0.1635793 | 0.0413731 |

Ni = Ni(0), S = H<sub>2</sub>S, W = H<sub>2</sub>O

**Table S3** Energies (Hartree)

| Systems                         | E            | IP        | EA        |
|---------------------------------|--------------|-----------|-----------|
| CuS <sub>3</sub>                | -229.7969856 | 0.5054003 | 0.1289577 |
| CuS <sub>2</sub> W              | -294.9319724 | 0.5000981 | 0.1242178 |
| CuSW <sub>2</sub>               | -360.065509  | 0.49955   | 0.1204292 |
| CuW <sub>3</sub>                | -425.1982756 | 0.5012568 | 0.1133734 |
|                                 |              |           |           |
| CuS <sub>4</sub>                | -241.0890628 | 0.4742501 | 0.1099928 |
| CuS <sub>3</sub> W              | -306.2227281 | 0.469012  | 0.1049437 |
| CuS <sub>2</sub> W <sub>2</sub> | -371.3550943 | 0.4604211 | 0.1013979 |
| CuSW <sub>3</sub>               | -436.4860357 | 0.4646355 | 0.0976437 |
| CuW <sub>4</sub>                | -501.6157262 | 0.4538439 | 0.0877684 |

Cu = Cu(I), S = H<sub>2</sub>S, W = H<sub>2</sub>O

**Table S4** Energies (Hartree)

| Systems                         | E            | IP        | EA        |
|---------------------------------|--------------|-----------|-----------|
| ZnS <sub>3</sub>                | -98.7790877  | 0.7110139 | 0.3628225 |
| ZnS <sub>2</sub> W              | -163.9292467 | 0.7245112 | 0.3567685 |
| ZnSW <sub>2</sub>               | -229.0779418 | 0.7622352 | 0.3511484 |
| ZnW <sub>3</sub>                | -294.2272689 | 0.8319197 | 0.3460078 |
|                                 |              |           |           |
| ZnS <sub>4</sub>                | -110.1038431 | 0.6740344 | 0.3172943 |
| ZnS <sub>3</sub> W              | -175.2538937 | 0.6803614 | 0.3097532 |
| ZnS <sub>2</sub> W <sub>2</sub> | -240.4040006 | 0.6909088 | 0.3025391 |
| ZnSW <sub>3</sub>               | -305.5541811 | 0.7203428 | 0.2965467 |
| ZnW <sub>4</sub>                | -370.704691  | 0.7835886 | 0.2903615 |

Zn = Zn(II), S = H<sub>2</sub>S, W = H<sub>2</sub>O

**Table S5** Energies (Hartree)

| Systems                         | E            | IP        | EA        |
|---------------------------------|--------------|-----------|-----------|
| NiP <sub>3</sub>                | -194.060785  | 0.2009925 | 0.0419825 |
| NiP <sub>2</sub> N              | -242.3236863 | 0.1703726 | 0.035982  |
| NiPN <sub>2</sub>               | -290.5810887 | 0.1408571 | 0.036447  |
|                                 |              |           |           |
| NiP <sub>4</sub>                | -202.3217475 | 0.1934532 | 0.046828  |
| NiP <sub>3</sub> N              | -250.5806171 | 0.1692964 | 0.0395696 |
| NiP <sub>2</sub> N <sub>2</sub> | -298.8383613 | 0.1489447 | 0.0384231 |
| NiPN <sub>3</sub>               | -347.0887026 | 0.1282377 | 0.042502  |

Ni = Ni(0), P = PH<sub>3</sub>, N = NH<sub>3</sub>

**Table S6** Energies (Hartree)

| Systems            | E            | IP        | EA        |
|--------------------|--------------|-----------|-----------|
| CuP <sub>3</sub>   | -220.7450272 | 0.4887765 | 0.1140405 |
| CuP <sub>2</sub> N | -269.0287613 | 0.4788629 | 0.0981292 |
| CuPN <sub>2</sub>  | -317.3110108 | 0.471244  | 0.096437  |
| CuN <sub>3</sub>   | -365.591394  | 0.4645418 | 0.0904202 |
|                    |              |           |           |
| CuP <sub>4</sub>   | -229.0101392 | 0.4579169 | 0.0700275 |
| CuP <sub>3</sub> N | -277.2908259 | 0.4496145 | 0.0900171 |

# Supplementary Material (ESI) for New Journal of Chemistry  
 # This journal is (c) The Royal Society of Chemistry and  
 # The Centre National de la Recherche Scientifique, 2007

|                          |              |           |           |
|--------------------------|--------------|-----------|-----------|
| $\text{CuP}_2\text{N}_2$ | -325.5705088 | 0.4405296 | 0.0876685 |
| $\text{CuPN}_3$          | -373.8475967 | 0.4300554 | 0.0841425 |
| $\text{CuN}_4$           | -422.1233301 | 0.4146616 | 0.0684476 |

$\text{Cu} = \text{Cu(I)}, P = \text{PH}_3, N = \text{NH}_3$

**Table S7** Energies (Hartree)

| Systems                  | E            | IP        | EA        |
|--------------------------|--------------|-----------|-----------|
| $\text{ZnP}_3$           | -89.7571322  | 0.7082913 | 0.300054  |
| $\text{ZnP}_2\text{N}$   | -138.051844  | 0.7161157 | 0.3034507 |
| $\text{ZnPN}_2$          | -186.3462742 | 0.7447929 | 0.3016653 |
| $\text{ZnN}_3$           | -234.6400918 | 0.7990283 | 0.3010362 |
|                          |              |           |           |
| $\text{ZnP}_4$           | -98.0540388  | 0.6657612 | 0.2571632 |
| $\text{ZnP}_3\text{N}$   | -146.3484241 | 0.673536  | 0.2530844 |
| $\text{ZnP}_2\text{N}_2$ | -194.6429284 | 0.6790783 | 0.249849  |
| $\text{ZnPN}_3$          | -242.9364522 | 0.700612  | 0.2472617 |
| $\text{ZnN}_4$           | -291.2302167 | 0.739395  | 0.2462019 |

$\text{Zn} = \text{Zn(II)}, P = \text{PH}_3, N = \text{NH}_3$
